# Supplementary material for: Different Effect of Media Opacity on Vessel Density Measured by Different Optical Coherence Tomography Angiography Algorithms
Source: PubMed Central journal article supplement — Transl Vis Sci Technol. 2020 Jul 13;9(8):19. doi: 10.1167/tvst.9.8.19 (PMC7422875; doi:10.1167/tvst.9.8.19), 2020-07-13
Supplement: tvst-9-8-19_s001.pdf [file tvst-9-8-19_s001.pdf]

## **Supplementary figure legends**

**Supplementary Figure 1.** Bland-Altman plots of VD between with and without filter in Cirrus OCTA.

(A) parafoveal region; (B) inner superior region; (C) inner nasal region; (D) inner inferior region; (E) inner temporal region; VD, vessel density; OD, optical density; LOA, 95% limits of agreement.

**Supplementary Figure 2.** Bland-Altman plots of VD between with and without filter in Triton OCTA.

(A) parafoveal region; (B) inner superior region; (C) inner nasal region; (D) inner inferior region; (E) inner temporal region; VD, vessel density; OD, optical density; LOA, 95% limits of agreement.

# Cirrus OCTA

## A. Parafoveal region

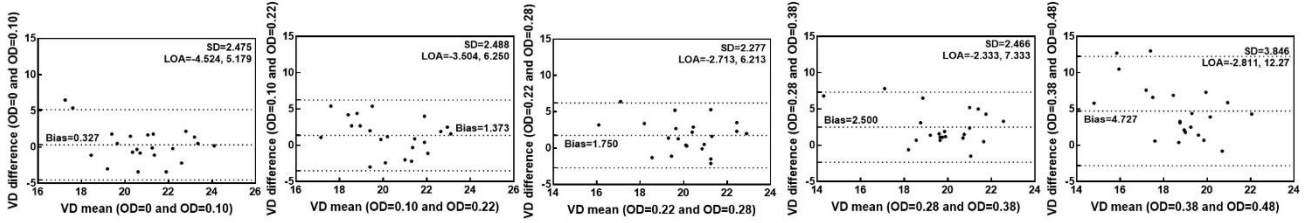

## B. Inner superior region

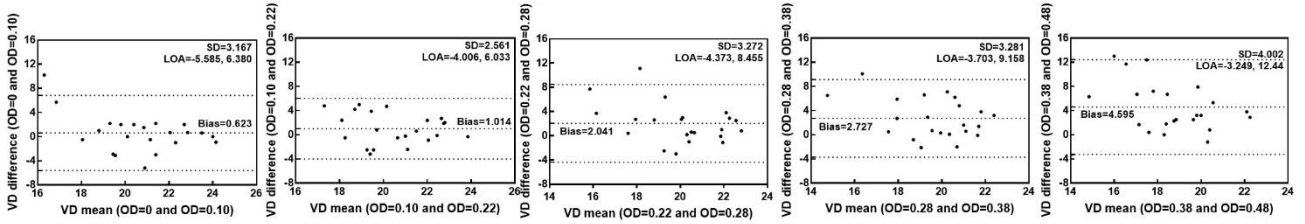

## C. Inner nasal region

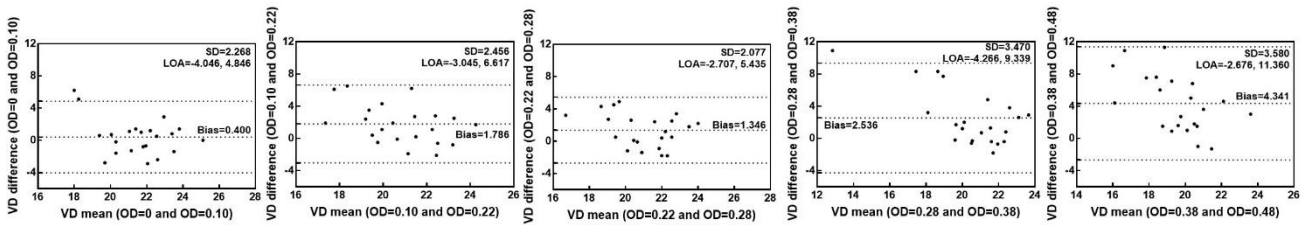

## D. Inner inferior region

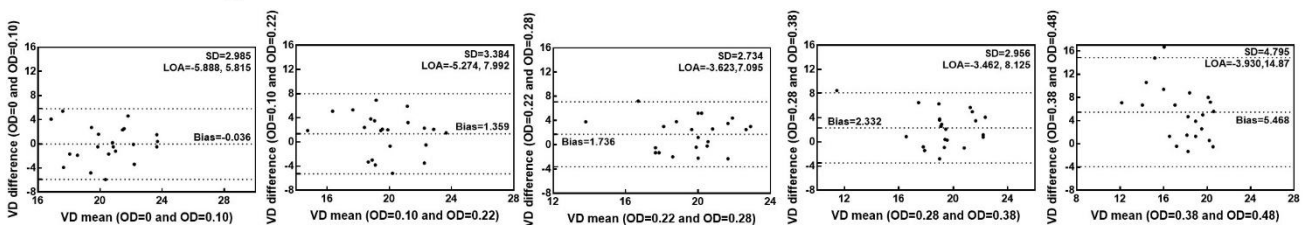

## E. Inner temporal region

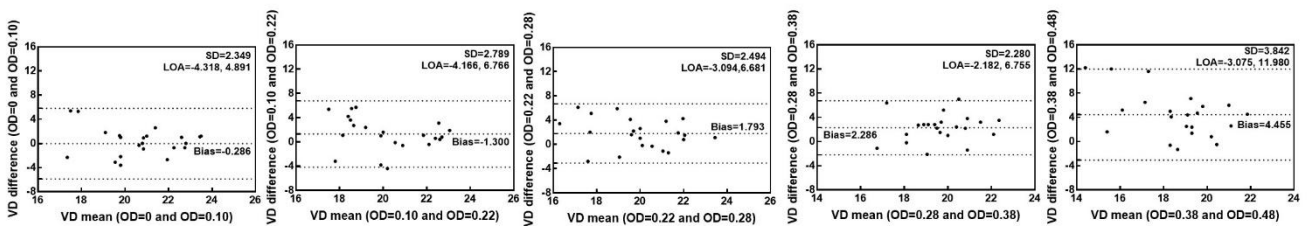

Supplementary Figure 1

# Triton OCTA

## A. Parafoveal region

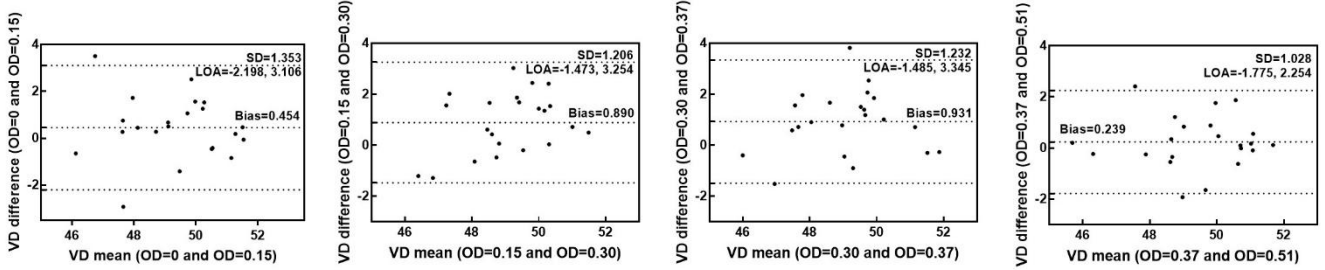

## B. Inner superior region

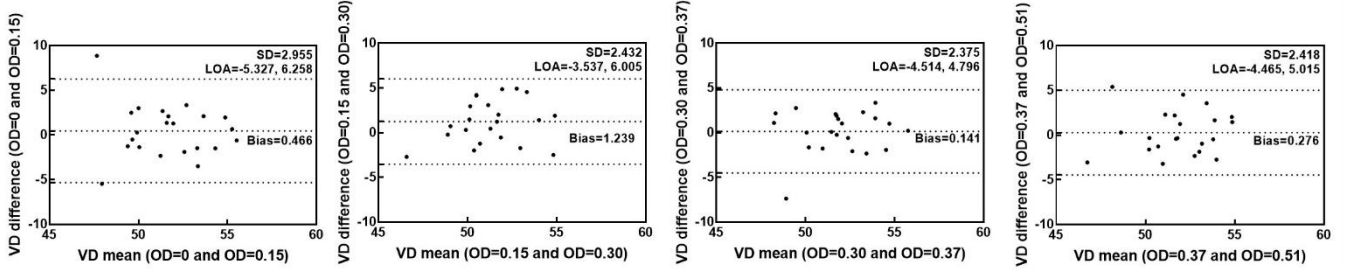

## C. Inner nasal region

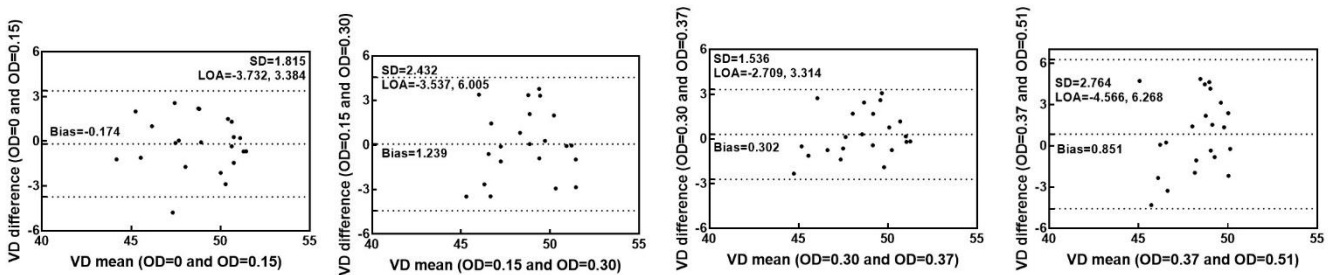

## D. Inner inferior region

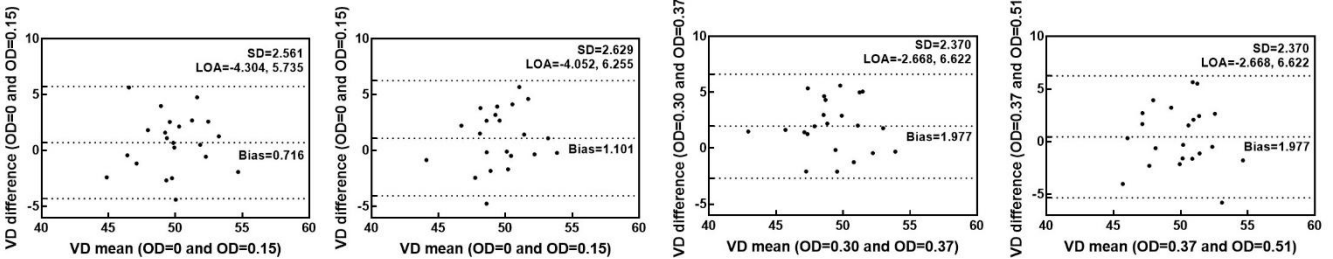

## E. Inner temporal region

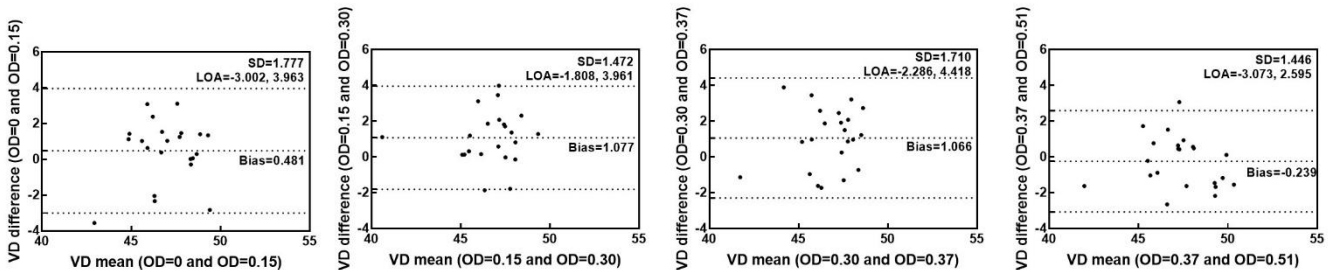

Supplementary Figure 2
